# Supplementary figures and images for: Impact of Immunopathy and Coagulopathy on Multi-Organ Failure and Mortality in a Lethal Porcine Model of Controlled and Uncontrolled Hemorrhage
Source: MDPI journal article supplement (doi:10.3390/ijms25052500), 2024-02-21

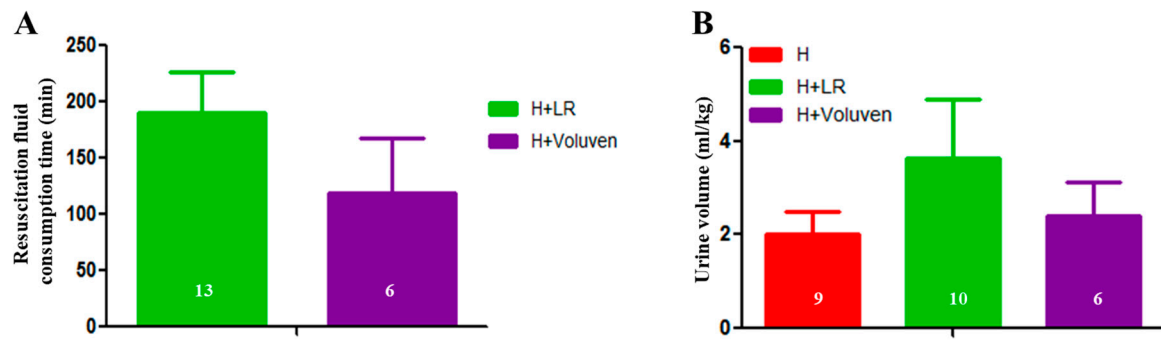

**Supplemental Figure S1.** Fluid resuscitation time and urine output volumes after hemorrhage.

Supplement: s1 [file s1]
